# Supplementary material for: Differential bicodon usage in lowly and highly abundant proteins
Source: PubMed Central journal article supplement (PMC5346287; doi:10.7717/peerj.3081), 2017-03-09

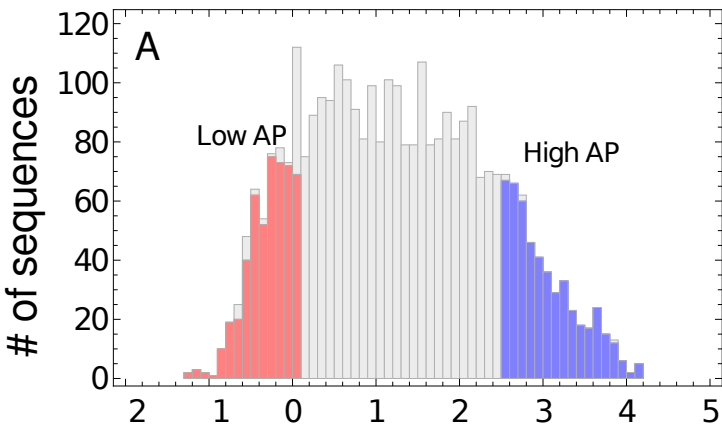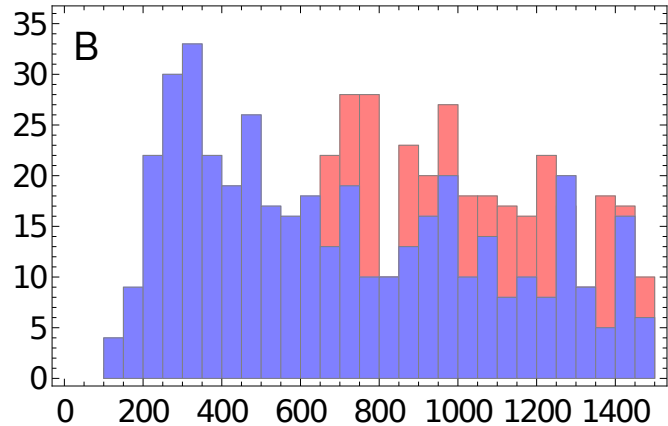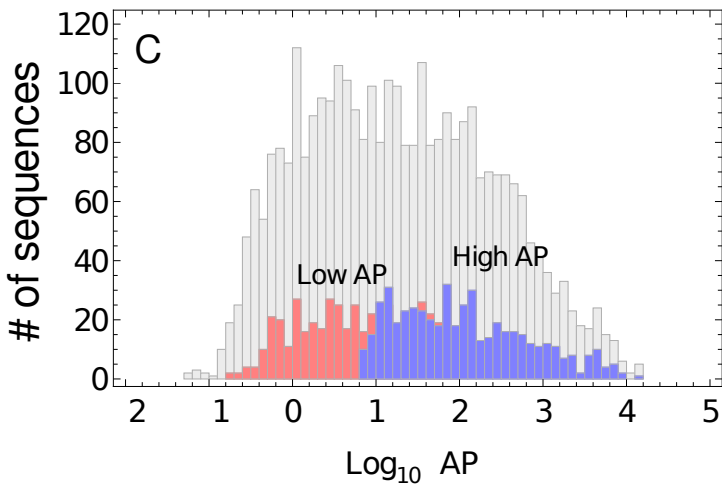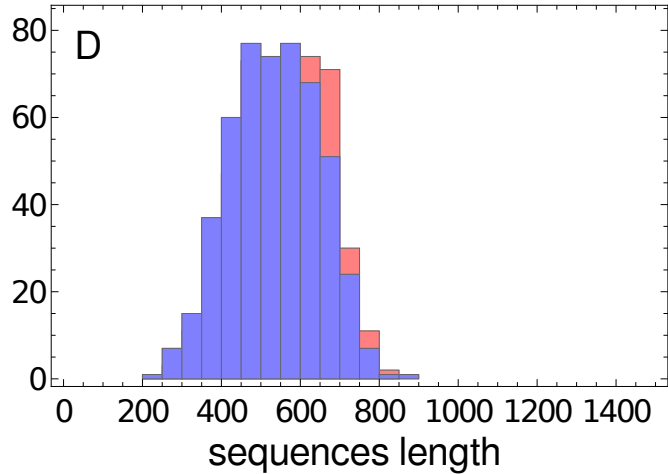

Supplement: peerj-05-3081-s009.pdf [file peerj-05-3081-s009.pdf]
