# Supplementary material for: Differential bicodon usage in lowly and highly abundant proteins
Source: PubMed Central journal article supplement (PMC5346287; doi:10.7717/peerj.3081), 2017-03-09
Supplement: peerj-05-3081-s012.pdf [file peerj-05-3081-s012.pdf]

| bicodon | Low PA | High PA |
|---------|--------|---------|
| AAAAAA  | 460    | 132     |
| AAAAAG  | 389    | 198     |
| AAGAAA  | 494    | 401     |
| AAGAAG  | 276    | 766     |

⇒

| bicodon | Low PA | High PA |
|---------|--------|---------|
| AAGAAG  | 276    | 766     |
| others  | 1343   | 731     |

|         | Low PA   | High PA  |
|---------|----------|----------|
| bicodon | <b>a</b> | <b>b</b> |
| others  | <b>c</b> | <b>d</b> |

$$p\text{-value} = \frac{(a+b)! (c+d)! (a+c)! (b+d)!}{(a+b+c+d)! a! c! b! d!}$$
