# Supplementary material for: Differential bicodon usage in lowly and highly abundant proteins
Source: PubMed Central journal article supplement (PMC5346287; doi:10.7717/peerj.3081), 2017-03-09
Supplement: peerj-05-3081-s014.pdf [file peerj-05-3081-s014.pdf]

# Pause Propensity

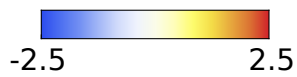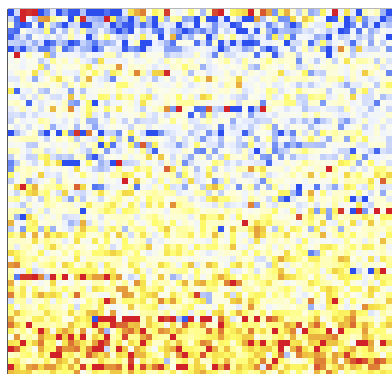

*A. thaliana*

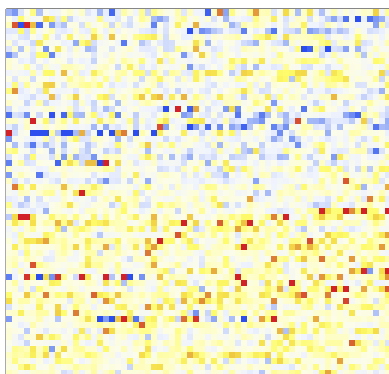

*M. musculus*

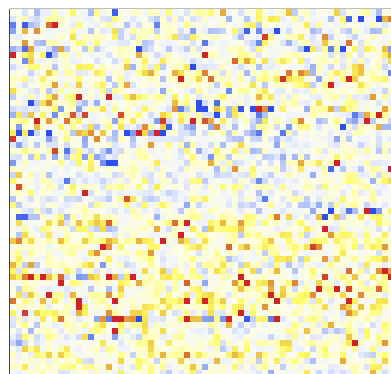

*H. sapiens*

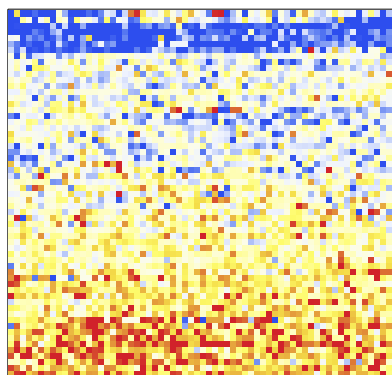

*C. Elegans*

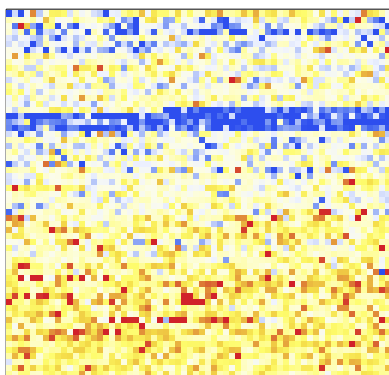

*D. melanogaster*

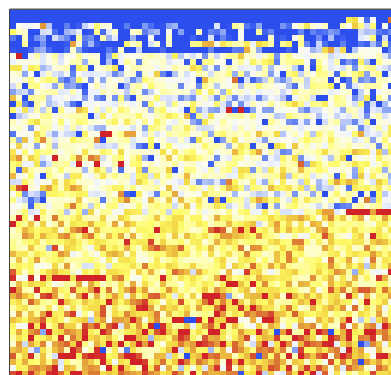

*S. cerevisiae*

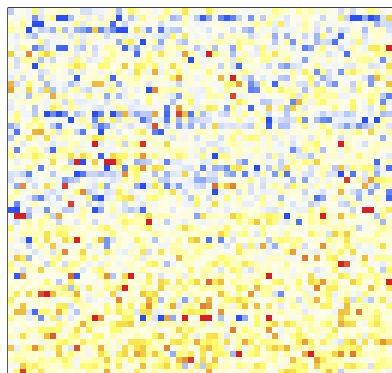

*E. coli*

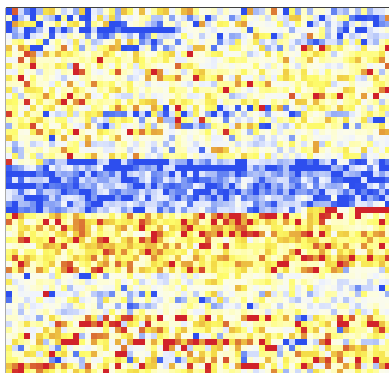

*B. subtilis*

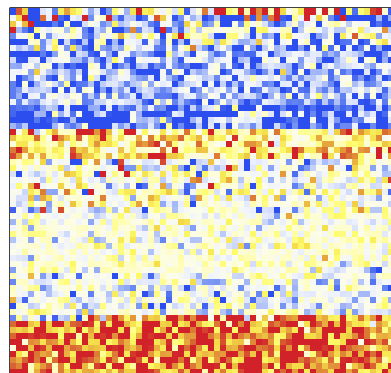

*M. aeruginosa*
